# Supplementary material for: Electrochemical biosensors in healthcare services: bibliometric analysis and recent developments
Source: PeerJ journal article supplement (doi:10.7717/peerj.15566), 2023-06-27
Supplement: Supplementary_Figure_1.pdf [file Supplementary_Figure_1.pdf]

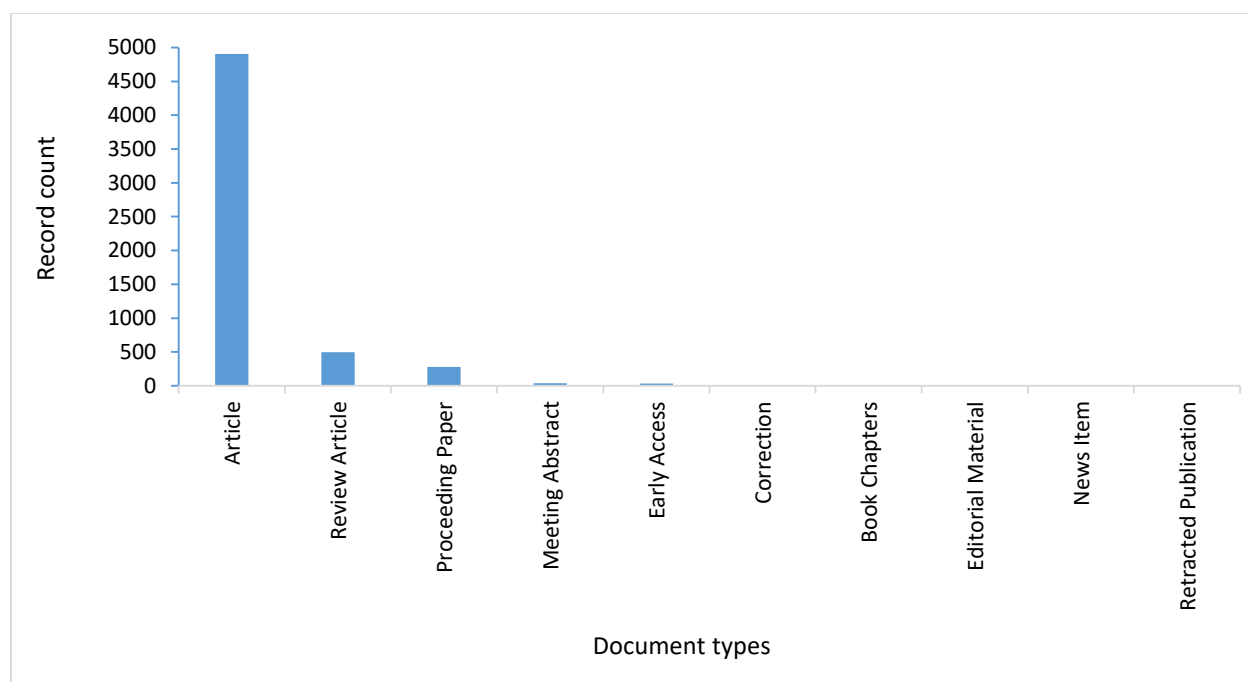

Supplementary Figure 1. Publication types of electrochemical biosensor(s) for healthcare with counts
