# Supplementary material for: Electrochemical biosensors in healthcare services: bibliometric analysis and recent developments
Source: PeerJ journal article supplement (doi:10.7717/peerj.15566), 2023-06-27
Supplement: Supplementary_figure_2.pdf [file Supplementary_figure_2.pdf]

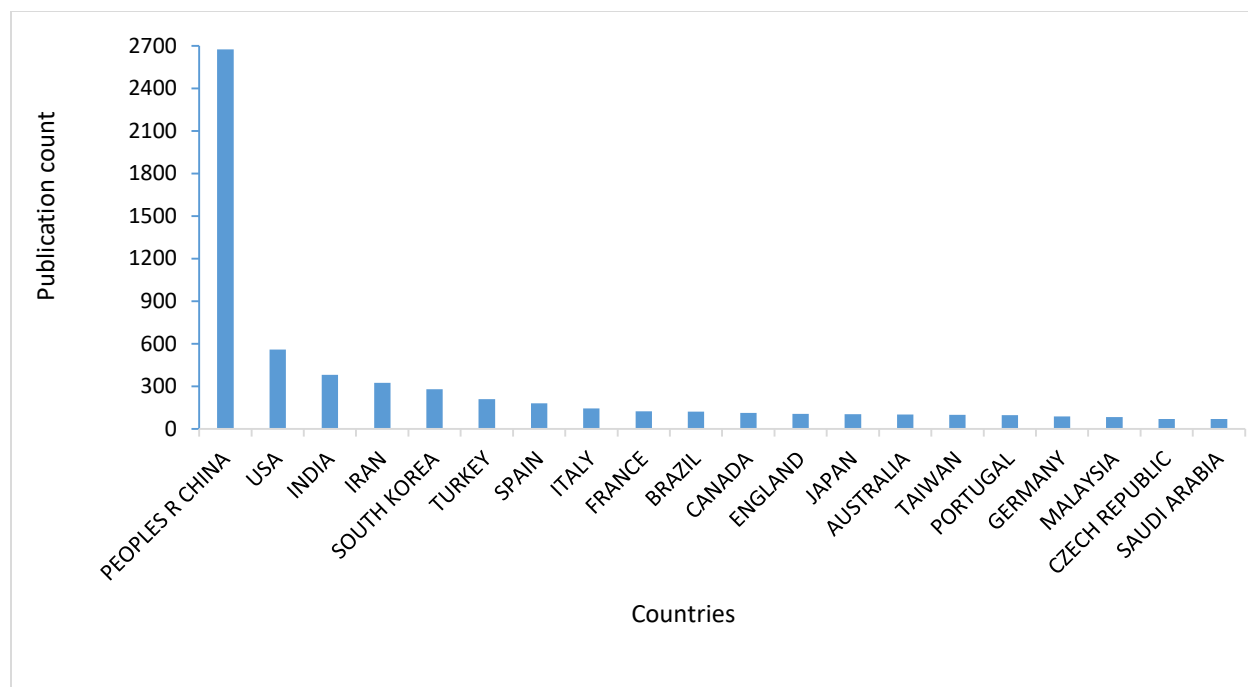

Supplementary Figure 2. Best 20 countries by number of publications
