# Supplementary material for: Electrochemical biosensors in healthcare services: bibliometric analysis and recent developments
Source: PeerJ journal article supplement (doi:10.7717/peerj.15566), 2023-06-27
Supplement: Supplementary_figure_5.pdf [file Supplementary_figure_5.pdf]

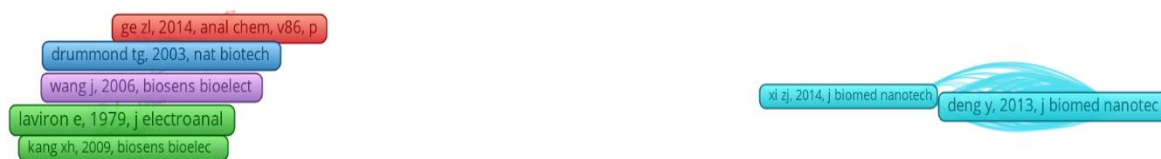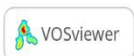

Supplementary Figure 5. Co-citation analyses of reference. Colors indicate cluster of related terms.
